# Supplementary material for: Transcriptome analysis provides insights into the stress response crosstalk in apple (Malus × domestica) subjected to drought, cold and high salinity
Source: PubMed Central journal article supplement (PMC6588687; doi:10.1038/s41598-019-45266-0), 2019-06-21
Supplement: 41598_2019_45266_MOESM1_ESM.pdf [file 41598_2019_45266_MOESM1_ESM.pdf]

## Supplementary Data

**Title:** Transcriptome analysis provides insights into the stress response crosstalk in apple (*Malus × domestica*) subjected to drought, cold and high salinity

**Authors:**

Xingliang Li<sup>1,2</sup>, Minji Li<sup>1</sup>, Beibei Zhou<sup>1</sup>, Yuzhang Yang<sup>1</sup>, Qiping Wei<sup>1,2</sup> & Junke Zhang<sup>1</sup>✉

**Address:**

<sup>1</sup>Beijing Engineering Research Center for Deciduous Fruit Trees, Beijing Academy of Forestry and Pomology Sciences, Beijing 100093, P.R.China.

<sup>2</sup>Beijing Collaborative Innovation Center for Eco-environmental Improvement with Forestry and Fruit Trees, Beijing 102206, P.R.China.

✉Author for correspondence, e-mail: [zhangjk@nwsuaf.edu.cn](mailto:zhangjk@nwsuaf.edu.cn))

**Competing financial interests:** The authors declare no competing financial interests.

**Supplementary Table 1.** Statistics for apple RNA-Seq libraries

| Library name  | Clean reads | Clean bases   | GC Content (%) | Cycle Q30 (%) |
|---------------|-------------|---------------|----------------|---------------|
| Control       | 27,347,957  | 8,122,170,498 | 46.74          | 93.74         |
| Drought       | 24,696,421  | 7,330,831,802 | 46.37          | 93.75         |
| Cold          | 32,648,644  | 9,755,823,688 | 47.33          | 93.54         |
| High-salinity | 24,954,185  | 7,440,833,532 | 46.60          | 93.71         |
| Average       | 27,411,801  | 8,162,414,880 | 46.76          | 93.69         |

**Supplementary Table 2.** Summary of Illumina transcriptome assembly for apple

| Library    | Total Reads | Mapped Reads           | Uniq Mapped Reads      | Unigene        |                  |                  |
|------------|-------------|------------------------|------------------------|----------------|------------------|------------------|
|            |             |                        |                        | < 300bp        | 300-1000bp       | >1000bp          |
| Transcript | 54,823,604  | 45,451,370<br>(82.90%) | 43,891,393<br>(80.08%) | 4165<br>(9.52) | 18674<br>(42.68) | 20913<br>(47.80) |

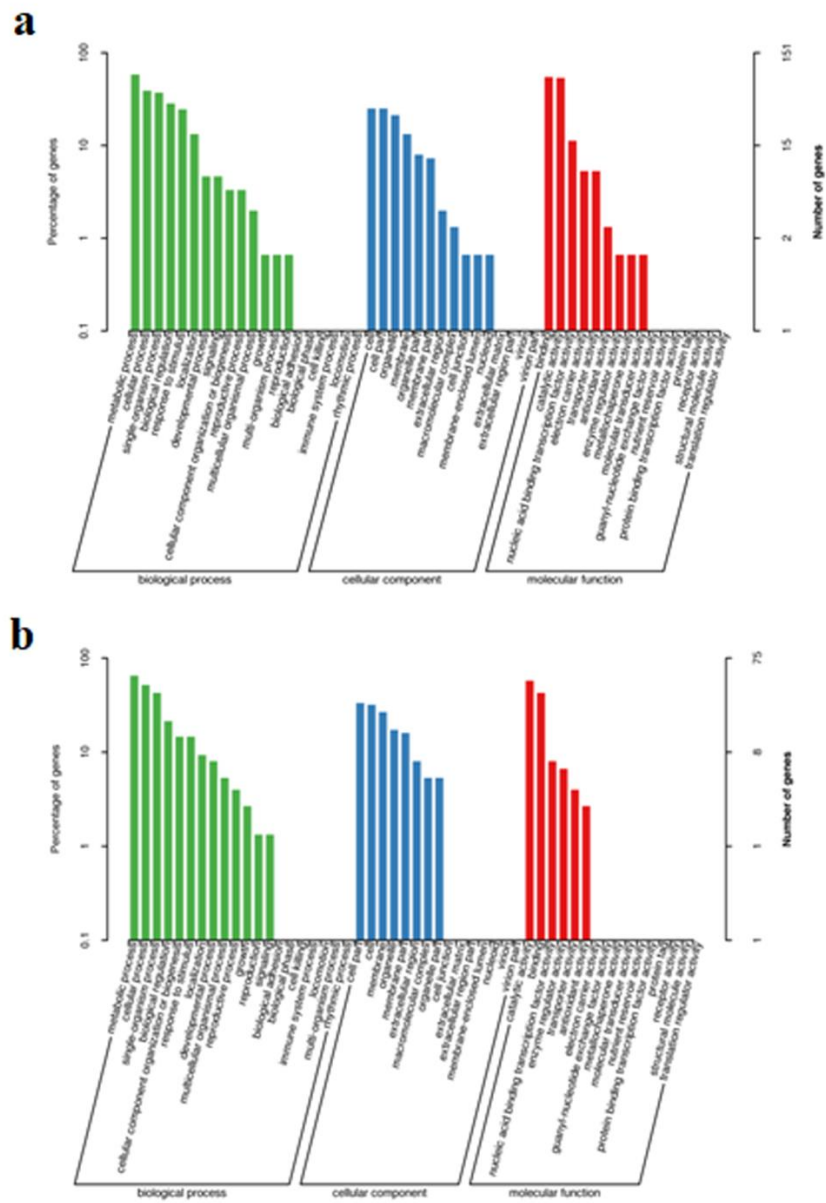

**Supplementary Figure 1.** The result of gene ontology (GO) classification for common differentially expressed genes (DEGs) involved in the crosstalk between drought, cold and high-salinity stress regulation. **a** Upregulated DEGs; **b** Downregulated DEGs.

**Supplementary Table 3.** Primers used for qRT-PCR of differentially expressed genes (DEGs).

| No. | Gene                   | Sequence No. | Primer Sequence (5' - 3')                                            |
|-----|------------------------|--------------|----------------------------------------------------------------------|
| 1   | <i>DGK1</i>            | MD06G1200300 | Forward: GAGCCAGAGCAAGAAGTCCAAGC<br>Reverse: TGCTCCTCTTGAAACTGGGCTTA |
| 2   | <i>ABCB13</i>          | MD15G1010400 | Forward: CGAGAACAGATGGGATTGGTAAG<br>Reverse: TCTCCTGCCTGAGTGTGTAGC   |
| 3   | <i>PP2C-37a</i>        | MD01G1139200 | Forward: GGAACCCAACGGAAATCACT<br>Reverse: GACCTCCTCGTCCATCTCA        |
| 4   | <i>PP2C-37b</i>        | MD07G1203700 | Forward: TTGTGGAAGATGATGCTGGTG<br>Reverse: ACACCGAAGTCATACCGAACC     |
| 5   | <i>PP2C-51a</i>        | MD07G1291000 | Forward: GGTCATCACTTGGAACGGAAAC<br>Reverse: CATCCTGGTTCGGTTTCGTTT    |
| 6   | <i>PP2C-51b</i>        | MD01G1220800 | Forward: TGATGCGATTGATTGGGAGAC<br>Reverse: GCTTCCGTTCCAGTTGATGAC     |
| 7   | <i>PP2C-56</i>         | MD15G1195800 | Forward: TGCGTAGGGAGGAACAACAAG<br>Reverse: GCCAAAGAAATGAACGGGTG      |
| 8   | <i>PP2C-77a</i>        | MD02G1084600 | Forward: AGTGGATGCTGAGATTGGAGGAG<br>Reverse: TGCTACGATAATATGCGTTGGAC |
| 9   | <i>PP2C-77b</i>        | MD15G1212000 | Forward: CGTGTCAAACGTGGCGATTTC<br>Reverse: CATCGCAAGAACACCGCAAAC     |
| 10  | <i>SAUR32</i>          | MD07G1297400 | Forward: GCTGAAAGACATCCCGAAAG<br>Reverse: TTGAACGGTGCGAAACTCCT       |
| 11  | <i>SAUR40</i>          | MD12G1113400 | Forward: ACTGGAGTCGTTGAGTAACCCTG<br>Reverse: TCTTCTCCTCCTGCATGTTT    |
| 12  | <i>ABI5-5a</i>         | MD05G1082000 | Forward: GGCAGTCTTCGGTGTACTCAT<br>Reverse: AGTCTCCTCAGCGTCCCTAT      |
| 13  | <i>ABI5-5b</i>         | MD15G1081800 | Forward: CACTTTGGCTCCGAGTTCAGG<br>Reverse: AGGCACGGGTGACACGGATG      |
| 14  | <i>ERF1b</i>           | MD13G1213100 | Forward: GTTGAAAGAGTCCGCAAATCG<br>Reverse: CTTCAAACACCACCACATTCTC    |
| 15  | <i>SAPK3</i>           | MD06G1046300 | Forward: GATTTAGTGAAGACGAGGCAAGG<br>Reverse: AGCAATGTATGCAGGTGTTCCA  |
| 16  | <i>BKII</i>            | MD08G1102600 | Forward: CTCCTCGCTCCTCCACCAACT<br>Reverse: GTCTCGTGTGTTGCTTCCCTGA    |
| 17  | <i>HPt3a</i>           | MD11G1293900 | Forward: GCCGTGACTCAGTGGCAGAAG<br>Reverse: GCACCTATCCAGGCACTGCTA     |
| 18  | $\beta$ - <i>ACTIN</i> | XM008356922  | Forward: CTGAACCCAAAGGCTAATCG<br>Reverse: ACTGGCGTAGAGGGAAAGAA       |

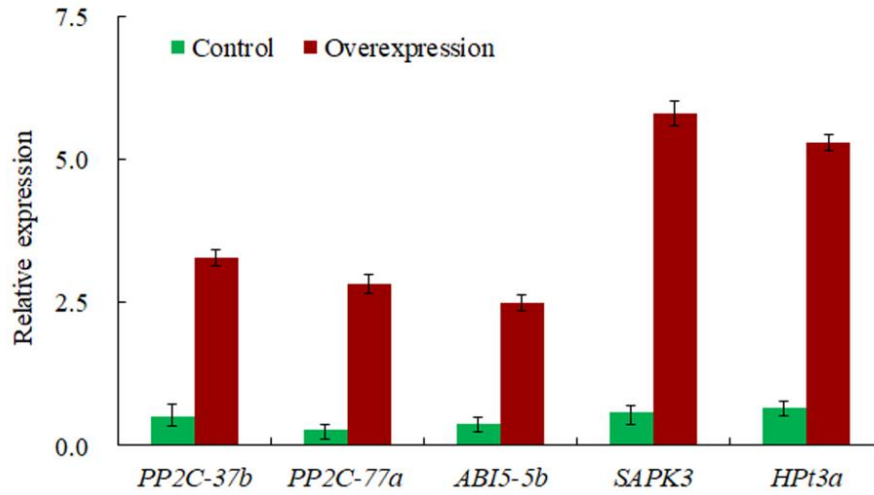

**Supplementary Figure 2.** Overexpression of five common differentially expressed genes (DEGs) in apple calli. GenBank accession numbers: *PP2C-37b* (XM008373834.2); *PP2C-77a* (XM008390079.2); *ABI5-5b* (XM008379818.2); *SAPK3* (NM001320015.1); *HPT3a* (XM008361181.2).

**Supplementary Table 4.** Primers used for qRT-PCR of drought, cold and salinity related genes

| No. | Gene          | Primer sequence (5' - 3')                                             | GenBank Accession No. |
|-----|---------------|-----------------------------------------------------------------------|-----------------------|
| 1   | <i>CSD1</i>   | Forward: CTGGGCCACACTTCAATCCTAA<br>Reverse: TAGAGGTATCTGCTTGCAATAAGA  | LOC103450984          |
| 2   | <i>APX2a</i>  | Forward: GAAGCACTGTGCTCCGATAGTC<br>Reverse: GAATCTCAGGCCCTCTGTAAAC    | LOC103413735          |
| 3   | <i>CAT1</i>   | Forward: CCGAGAGGTCCAATTCTGCTC<br>Reverse: CTCGAAGGAAGTCAGCACATGT     | LOC103412104          |
| 4   | <i>DHAR3</i>  | Forward: CGTTTGTGCCAAGGCTTCCGTT<br>Reverse: CACAGGAACTTTACCTTCTGGGTA  | LOC103444197          |
| 5   | <i>GPX6</i>   | Forward: CCATGCAACCAGTTTGGAGCC<br>Reverse: GAGAAGTTCACCTTGATGCTGTCA   | LOC103446626          |
| 6   | <i>NCED2</i>  | Forward: CTGAAACAGGGGACCTCAAA<br>Reverse: CGTAGCTAAGCGCAAGAGT         | KJ719311              |
| 7   | <i>OST1</i>   | Forward: CTTGTTGGTGCTTATCCCTTTG<br>Reverse: CAGTGAAGATTCGGGAAAGGAG    | KJ563286              |
| 8   | <i>DREB2A</i> | Forward: GAGCAGGCGAGATGGGAACT<br>Reverse: TCCCTTGCCTTTCATACAGC        | XM008355947           |
| 9   | <i>DREB2B</i> | Forward: CCAGCCACAAACCCTAACTCA<br>Reverse: TTGGAGGTTCTTGCTTAACTTGG    | XM008393437           |
| 10  | <i>DREB2C</i> | Forward: CACCAATCCCACAGCACAAAC<br>Reverse: GTGTCACCCACAACGACTAAACC    | JQ669818              |
| 11  | <i>DREB6</i>  | Forward: GCTTCTGTGACGCCAAGCTTC<br>Reverse: TTAAGTGAAGATCGAAGCCCAATC   | GU732446              |
| 12  | <i>LOS5</i>   | Forward: GATTCACCGTGGAAAGTTGG<br>Reverse: TGATTGGCAGTCTCGCTTG         | XM008373811           |
| 13  | <i>NP1</i>    | Forward: CTCCCATTGTTATCATTCTGTGTC<br>Reverse: TTGTCGCCCTTGGAATTGGAAC  | XM008387740           |
| 14  | <i>CBF1</i>   | Forward: CTGAGGAGTCGGATGAGGTTTG<br>Reverse: CATAAGGGCACGTCAGCACAA     | DQ074478              |
| 15  | <i>CBF2</i>   | Forward: GAGTGTGAAAGCGGCGATGA<br>Reverse: GCCCTTCCGCATACTATCCAG       | KC603712              |
| 16  | <i>CBF3</i>   | Forward: GGCTCGGAACTTATCCAACCTG<br>Reverse: CCGACACTCCGCCAAACTCA      | XM008363090           |
| 17  | <i>ICE1</i>   | Forward: CAACACCGAGAACAAGGACGAG<br>Reverse: AGCAGCGAAGACAAGTTGGGAT    | NM_001294038          |
| 18  | <i>ZAT10</i>  | Forward: ACCACAGCCACTAAAGCAACA<br>Reverse: GAGCACTCGTGGGACCTTC        | HM122498              |
| 19  | <i>SOS1</i>   | Forward: CTCAAGAGGGTGCAGGACGTGTC<br>Reverse: CCTTCAGCTATAACAACCTCACTC | XM_008352758          |
| 20  | <i>SOS2</i>   | Forward: CAAAAGCACCATTCTCAAGCAC<br>Reverse: CCGACCAGCCAAAACCTCT       | XM008364679           |
| 21  | <i>SOS3</i>   | Forward: CTGGCTATGAGGACCCTGCGAC<br>Reverse: GATCGAACAAATTCTCCAAACTC   | XM008378497           |
| 22  | <i>NHX1</i>   | Forward: CCAGCACTGTCGTTTCACTCAC<br>Reverse: CTCGAGCTTTCGAACCTGTAC     | XM008352393           |
